# Supplementary material
Source: PubMed Central journal article supplement (PMC5860647)
Supplement: kwx208supplement.pdf [file kwx208supplement.pdf]

# Web Appendix to “Identification of homophily and preferential recruitment in respondent-driven sampling”

## Web Appendix 1

Unfortunately there are no general closed-form expressions for the extrema of  $h$  and  $p$  on  $\mathcal{C}(G_R, \mathbf{d}_R, \mathbf{Z}_R)$ . The space of compatible subgraphs can be very large, but straightforward optimization techniques permit finding these bounds quickly. We describe a stochastic optimization algorithm for finding the global optimum of an arbitrary function  $J$  of  $h$  and  $p$ , based on simulated annealing (1–4). The approach is similar to a quadratic programming framework introduced by De Paula, Richards-Shubik, and Tamer (5) for finding the identification set for certain functionals of graphs and vertex attributes. The optimization routine described here is constructive: it returns the (possibly not unique) pair  $(G_{SU}, \mathbf{Z}_{SU}) \in \mathcal{C}(G_R, \mathbf{d}_R, \mathbf{Z}_R)$  that maximizes a carefully chosen objective function  $\pi(\cdot)$ .

Let  $J : [-1, 1]^2 \rightarrow \mathbb{R}$  be a function taking arguments  $h(G_{SU}, \mathbf{Z}_{SU})$  and  $p(G_{SU}, G_R, \mathbf{t}_R, \mathbf{Z}_{SU})$  for  $(G_{SU}, \mathbf{Z}_{SU}) \in \mathcal{C}(G_R, \mathbf{d}_R, \mathbf{Z}_R)$ . We choose this function, abbreviated  $J(h, p)$ , so that a desired feature of  $\mathcal{C}(G_R, \mathbf{d}_R, \mathbf{Z}_R)$  coincides with the maximum of  $J$ . For example, the maximum of the function

$$J(h, p) = \frac{1}{1 + \epsilon + h}$$

on  $\mathcal{C}(G_R, \mathbf{d}_R, \mathbf{Z}_R)$  where  $\epsilon > 0$ , coincides with the lower identification bound of  $h$ . For concreteness in what follows, we will assume  $J(h, p)$  has this form; similar definitions can be formulated individually to find the maximum of  $h$ , and the minimum and maximum of  $p$ .

For  $T > 0$ , define the objective function  $\pi(h, p) \propto \exp[J(h, p)/T]$ . Our goal is to find  $(G_{SU}, \mathbf{Z}_{SU}) \in \mathcal{C}(G_R, \mathbf{d}_R, \mathbf{Z}_R)$  such that  $\pi(h(G_{SU}, \mathbf{Z}_{SU}), p(G_{SU}, G_R, \mathbf{t}_R, \mathbf{Z}_{SU}))$  is maximized. Let

$$K((G_{SU}, \mathbf{Z}_{SU}), (G_{SU}^*, \mathbf{Z}_{SU}^*))$$

be a transition kernel that describes the probability of moving from a state  $(G_{SU}, \mathbf{Z}_{SU}) \in \mathcal{C}(G_R, \mathbf{d}_R, \mathbf{Z}_R)$  to another state  $(G_{SU}^*, \mathbf{Z}_{SU}^*) \in \mathcal{C}(G_R, \mathbf{d}_R, \mathbf{Z}_R)$ . Let  $T_t$  be a positive non-decreasing sequence indexed by  $t$ , with  $\lim_{t \rightarrow \infty} T_t = 0$ . We construct an inhomogeneous Markov chain on  $\mathcal{C}(G_R, \mathbf{d}_R, \mathbf{Z}_R)$ . At step  $t$ , where the current state is  $(G_{SU}, \mathbf{Z}_{SU})$ , we accept the proposed state  $(G_{SU}^*, \mathbf{Z}_{SU}^*) \sim K((G_{SU}, \mathbf{Z}_{SU}), \cdot)$  with probability

$$\rho_t = \min \left\{ 1, \exp \left[ \frac{J(h(G_{SU}^*, \mathbf{Z}_{SU}^*), p(G_{SU}^*, G_R, \mathbf{t}_R, \mathbf{Z}_{SU}^*)) - J(h(G_{SU}, \mathbf{Z}_{SU}), p(G_{SU}, G_R, \mathbf{t}_R, \mathbf{Z}_{SU}))}{T_t} \right] \right\}.$$

The proposal function is described formally below.

As  $T_t \rightarrow 0$ , the samples  $(G_{SU}, \mathbf{Z}_{SU})_t$  become more concentrated around local maxima of  $\pi$ . Convergence of the sequence  $(G_{SU}, \mathbf{Z}_{SU})_t$  to a global optimum depends on its ability to escape local maxima of  $J$ . The sequence  $T_t$ , called the “cooling schedule”, controls the rate of convergence. Let

$\mathcal{M}$  denote the set of  $(G_{SU}, \mathbf{Z}_{SU}) \in \mathcal{C}(G_R, \mathbf{d}_R, \mathbf{Z}_R)$  for which  $J(h(G_{SU}, \mathbf{Z}_{SU}), p(G_{SU}, G_R, \mathbf{t}_R, \mathbf{Z}_{SU}))$  is equal to the global maximum. Careful choice of  $T_t$  ensures that the sequence of samples converges in probability to an element of  $\mathcal{M}$ .

**Proposition 1.** *Let the cooling schedule be given by  $T_t = (\epsilon \log(t))^{-1}$  where  $\epsilon > 0$  is a constant. Then  $\lim_{t \rightarrow \infty} \Pr((G_{SU}, \mathbf{Z}_{SU})_t \in \mathcal{M}) = 1$ .*

*Proof.* Let  $J(h, p) = 1/(1 + \epsilon + h)$  for  $0 < \epsilon < 1$  and let  $\mathcal{M}$  be the set of  $(G_{SU}, \mathbf{Z}_{SU})$  that achieve the global maximum of  $J$  on  $\mathcal{C}(G_R, \mathbf{d}_R, \mathbf{Z}_R)$ . Let the cooling schedule be given by  $T_t = (\epsilon \log(t))^{-1}$ . Following Hajek (3), we say that a state  $(G_{SU}, \mathbf{Z}_{SU}) \in \mathcal{C}(G_R, \mathbf{d}_R, \mathbf{Z}_R)$  communicates with  $\mathcal{M}$  at depth  $D$  if there exists a path in  $\mathcal{C}(G_R, \mathbf{d}_R, \mathbf{Z}_R)$  that starts at  $(G_{SU}, \mathbf{Z}_{SU})$  and ends at an element of  $\mathcal{M}$  such that the least value of  $J$  along the path is  $J(h(G_{SU}, \mathbf{Z}_{SU}), p(G_{SU}, G_R, \mathbf{t}_R, \mathbf{Z}_{SU})) - D$ . Let  $D^*$  be the smallest number such that every  $(G_{SU}, \mathbf{Z}_{SU}) \in \mathcal{C}(G_R, \mathbf{d}_R, \mathbf{Z}_R)$  communicates with  $\mathcal{M}$  at depth  $D^*$ . Theorem 1 of Hajek (3) states that if  $T_t \rightarrow 0$  and  $\sum_{t=1}^{\infty} \exp[-D^*/T_t]$  diverges, then the sequence  $(G_{SU}, \mathbf{Z}_{SU})_t$  converges in probability to an element of  $\mathcal{M}$ .

First, note that since  $J(h, p) > 0$  for all  $h$ ,  $D^*$  is bounded above by the maximum of  $J$  on  $\mathcal{C}(G_R, \mathbf{d}_R, \mathbf{Z}_R)$ , and so

$$\begin{aligned} D^* &\leq \max_{(G_{SU}, \mathbf{Z}_{SU}) \in \mathcal{C}(G_R, \mathbf{d}_R, \mathbf{Z}_R)} J(h(G_{SU}, \mathbf{Z}_{SU}), p(G_{SU}, G_R, \mathbf{t}_R, \mathbf{Z}_{SU})) \\ &\leq \max_{(h, p) \in [-1, 1]^2} J(h, p) \\ &= \max_{(h, p) \in [-1, 1]^2} 1/(1 + \epsilon + h) \\ &= 1/\epsilon. \end{aligned} \tag{1}$$

Now examining the divergence criterion,

$$\begin{aligned} \sum_{t=1}^{\infty} \exp[-D^*/T_t] &= \sum_{t=1}^{\infty} \exp[-D^* \epsilon \log(t)] \\ &= \sum_{t=1}^{\infty} \frac{1}{t^{D^* \epsilon}} \\ &\geq \sum_{t=1}^{\infty} \frac{1}{t} = \infty \end{aligned} \tag{2}$$

where the inequality is a consequence of  $D^* \epsilon \leq 1$ . Therefore  $\lim_{t \rightarrow \infty} \Pr((G_{SU}, \mathbf{Z}_{SU})_t \in \mathcal{M}) = 1$ , as claimed.  $\square$

## Web Appendix 2

Suppose  $(G_{SU}, \mathbf{Z}_{SU}) \in \mathcal{C}(G_R, \mathbf{d}_R, \mathbf{Z}_R)$  is a compatible augmented subgraph and trait set, and we wish to propose another compatible pair  $(G_{SU}^*, \mathbf{Z}_{SU}^*) \in \mathcal{C}(G_R, \mathbf{d}_R, \mathbf{Z}_R)$ . We outline two proposal mechanisms. The first removes or adds an edge in  $G_{SU}$ . If necessary, a new unsampled vertex  $u$  is invented, and assigned a trait value  $Z_u$ . Let  $U = \{u \in V_{SU} : u \notin V_R\}$  be the set of unsampled vertices. Furthermore, let  $U_{-k} = \{u \in V_{SU} \setminus V_R : \{k, u\} \notin E_{SU}\}$  be the set of unsampled vertices in  $U$  that are *not* connected to  $k \in V_R$ .

- 1: Let  $G_{SU}^* = G_{SU}$  and  $\mathbf{Z}_{SU}^* = \mathbf{Z}_{SU}$
- 2: Randomly choose  $i \in V_R$  and  $j \in V_{SU}$  with  $i \neq j$ .

```

3: if  $\{i, j\} \in E_{SU}$  and  $\{i, j\} \notin E_R$  then
4:   Remove  $\{i, j\}$  from  $E_{SU}^*$ 
5:    $B \sim \text{Bernoulli}(1/2)$ 
6:   if  $B < 0.5$  and  $U_{-i} \neq \emptyset$  then
7:     Randomly choose  $u \in U_{-i}$ 
8:   else
9:     Add a new vertex  $u$  to  $V_{SU}^*$ 
10:    Randomly choose a trait  $Z_u^* \in \{0, 1\}$ 
11:  end if
12:  Add  $\{i, u\}$  to  $E_{SU}^*$ 
13:  if  $j \in V_R$  then
14:     $B \sim \text{Bernoulli}(1/2)$ 
15:    if  $B < 0.5$  and  $U_{-j} \neq \emptyset$  then
16:      Randomly choose  $u \in U_{-j}$ 
17:    else
18:      Add a new vertex  $u$  to  $V_{SU}^*$ 
19:      Randomly choose a trait  $Z_u^* \in \{0, 1\}$ 
20:    end if
21:  end if
22:  Add  $\{j, u\}$  to  $E_{SU}^*$ 
23: else if  $\{i, j\} \notin E_{SU}$  and  $\exists u_1, u_2 \in U : \{i, u_1\} \in E_{SU}$  and  $\{j, u_2\} \in E_{SU}$  then
24:   Remove  $\{i, u_1\}$  and  $\{j, u_2\}$  from  $E_{SU}^*$ 
25:   Add  $\{i, j\}$  to  $E_{SU}^*$ 
26: end if
27: Remove any isolated vertices from  $V_{SU}^*$ 

```

The space  $\mathcal{C}(G_R, \mathbf{d}_R, \mathbf{Z}_R)$  is connected via proposals of this type (see 6, for explanation). The second proposal mechanism accelerates exploration of  $\mathcal{C}(G_R, \mathbf{d}_R, \mathbf{Z}_R)$  by switching the trait of an unsampled vertex:

- 1: Choose  $u \in \{u \in V_{SU} : u \notin V_R\}$ .
- 2: Set  $Z_u^* = 1 - Z_u$ .

Together, these proposal mechanisms result in a well-mixing sequence  $(G_{SU}, \mathbf{Z}_{SU})_t$ .

## References

- [1] Kirkpatrick C. D., Vecchi M. P.. Optimization by simulated annealing *Science*. 1983;220:671–680.
- [2] Černý Vladimír. Thermodynamical approach to the traveling salesman problem: An efficient simulation algorithm *Journal of Optimization Theory and Applications*. 1985;45:41–51.
- [3] Hajek Bruce. Cooling schedules for optimal annealing *Mathematics of Operations Research*. 1988;13:311–329.
- [4] Bertsimas Dimitris, Tsitsiklis John. Simulated annealing *Statistical Science*. 1993;8:10–15.
- [5] De Paula Aureo, Richards-Shubik Seth, Tamer Elie T. Identification of Preferences in Network Formation Games *SSRN 2577410*. 2014.
- [6] Crawford Forrest W.. The graphical structure of respondent-driven sampling *Sociol Methodol*. 2016;46:187–211.
